# Supplementary material
Source: bioRxiv or medRxiv preprint supplement (https://medrxiv.org/highwire/filestream/72980/field_highwire_adjunct_files/0/2020.03.01.20029397-1.pdf)
Supplement: Supplementary file [file 2020.03.01.20029397-1.pdf]

## 伦理审查批件

|       |                                                                                                                                                                             |           |           |
|-------|-----------------------------------------------------------------------------------------------------------------------------------------------------------------------------|-----------|-----------|
| 批 件 号 | 2020-015-01-KY                                                                                                                                                              |           |           |
| 项目名称  | 重庆市 2019-nCov 肺炎患者流行病学和临床特征的多中心描述性回顾性分析                                                                                                                                     |           |           |
| 项目来源  | 研究者发起                                                                                                                                                                       |           |           |
| 研究单位  | 重庆市公共卫生医疗救治中心                                                                                                                                                               | 承担科室      | 隔离病房、负压病房 |
| 主要研究者 | 严晓峰、王导新                                                                                                                                                                     | 职 称       | 主任医师      |
| 审查类别  | 审查方式                                                                                                                                                                        | 审查日期      |           |
| 初始审查  | 快速审查                                                                                                                                                                        | 2020.2.25 |           |
| 审批文件  | <ol style="list-style-type: none"> <li>1. 研究方案：V1.1，2020-02-21</li> <li>2. 豁免知情同意书申请：V1.1，2020-02-25</li> <li>3. 主要研究者简历临床研究项目人员组成及预分工表、研究者声明、研究<br/><br/>经济利益声明</li> </ol> |           |           |

审查意见：同 意

根据国家卫健委《涉及人的生物医学研究伦理审查办法》（2016）、NMPA《药物临床试验质量管理规范（2003）》、《药物临床试验伦理审查工作指导原则（2010）》、《医疗器械临床试验规定（2004）》、《体外诊断试剂临床研究技术指导原则（2007）》、WMA《赫尔辛基宣言》和 CIOMS《人体生物医学研究国际道德指南》的伦理原则，经本伦理委员会审查，同意按所批准的文件开展本项研究。

请遵循 GCP 原则、遵循伦理委员会批准的方案开展临床研究，保护受试者的健康与权利。

研究过程中若变更主要研究者，对临床研究方案、知情同意书、招募材料等的任何修改，请申请人提交修正案审查申请。

发生严重不良事件，请申请人及时提交严重不良事件报告。

请按照伦理委员会规定的年度/定期跟踪审查频率，按期提交研究进展报告；申办者应当向组长单位伦理委员会提交各中心研究进展的汇总报告；当出现任何可能显著影响试验进行、或增加受试者危险的情况时，请申请人及时向伦理委员会提交书面报告。

研究纳入了不符合纳入标准或符合排除标准的受试者，符合中止试验规定而未让受试者退出研究，给予错误治疗或剂量，给予方案禁止的合并用药等没有遵从方案开展研究的情况；或可能对受试者的权益/健康、以及研究的科学性造成不良影响等违背 GCP 原则的情况，请申办者/监查员/研究者提交违背方案报告。

申请人暂停或提前终止临床研究，请及时提交暂停/终止研究报告。

完成临床研究，请申请人提交研究完成报告。

|             |                                                                                                                  |      |              |
|-------------|------------------------------------------------------------------------------------------------------------------|------|--------------|
| 年度/定期跟踪审查频率 | 12 个月                                                                                                            |      |              |
| 批件有效期       | 1 年，截止日期： 2021 年 2 月 25 日<br>(如试验逾期未实施，需提出延长有效期申请)                                                               |      |              |
| 伦理委员会联系人    | 陈亚玲                                                                                                              | 联系电话 | 023-65518197 |
| 主任委员签字      | 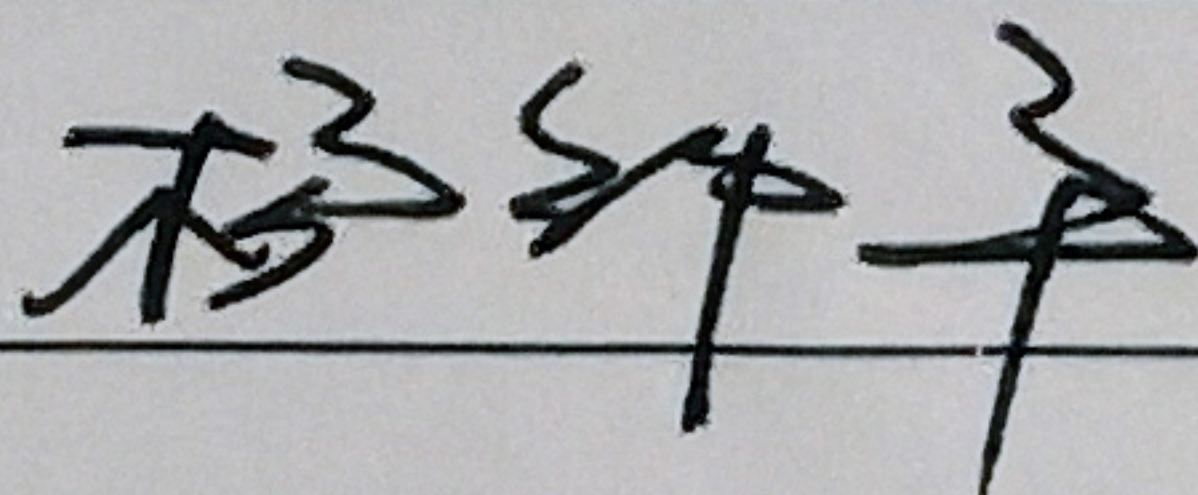                             |      |              |
| 伦理委员会       | 重庆市公共卫生医疗救治中心伦理委员会 (盖章)<br> |      |              |
| 日期          | 2020.2.26                                                                                                        |      |              |
